# Supplementary material for: Persistent Plasmodium falciparum and Plasmodium vivax infections in a western Cambodian population: implications for prevention, treatment and elimination strategies
Source: Springer Nature journal article supplement (doi:10.1186/s12936-016-1224-7), 2016-03-24

|          |     |     |     |     |     |     |     |     |     |     |     |
|----------|-----|-----|-----|-----|-----|-----|-----|-----|-----|-----|-----|
| KH010103 | Psp | Neg | Neg | Neg | Neg | Neg | Neg | Neg | Neg | Neg | Neg |
| KH010270 | Psp | Neg | Neg | Neg | Neg |     | Neg | Neg |     | Neg | Neg |
| KH010591 | Psp | Neg | Neg | Neg | Neg | Neg | Neg | Neg | Neg |     | Neg |
| KH010056 | Psp | Neg | Neg | Neg | Neg | Neg | Neg | Neg |     | Neg | Neg |
| KH030002 | Psp | Neg | Neg | Neg | Neg | Neg |     | Neg | Neg | Neg | Neg |
| KH010945 | Psp | Neg | Neg | Neg | Neg | Neg | Neg | Neg | Neg |     | Neg |
| KH021012 | Psp | Neg | Neg | Neg | Neg | Neg | Neg | Neg |     | Neg | Neg |
| KH010787 | Psp | Neg | Neg |     | Neg | Neg | Neg | Neg | Neg |     | Neg |
| KH020466 | Psp | Neg | Neg | Neg | Neg | Neg | Neg |     |     |     | Neg |
| KH020422 | Psp | Neg | Neg | Neg | Neg |     |     | Neg |     | Neg | Neg |
| KH010718 | Psp | Neg | Neg | Neg | Neg | Neg | Neg |     |     | Neg | Neg |
| KH010596 | Psp | Neg | Neg | Neg | Neg | Neg | Neg | Neg | Neg |     |     |
| KH010220 | Psp | Neg | Neg | Neg | Neg |     |     |     | Neg | Neg | Neg |
| KH010717 | Psp | Neg | Neg | Neg | Neg | Neg | Neg |     |     |     | Neg |
| KH020660 | Psp |     |     | Neg | Neg | Neg | Neg |     | Neg | Neg | Neg |
| KH010218 | Psp | Neg |     |     |     | Neg | Neg | Neg | Neg | Neg | Neg |
| KH020331 | Psp | Neg | Neg | Neg | Neg | Neg |     |     |     | Neg | Neg |
| KH010913 | Psp |     | Neg | Neg | Neg | Neg | Neg | Neg | Neg | Neg |     |
| KH020970 | Psp | Neg | Neg | Neg |     | Neg | Neg | Neg |     |     |     |
| KH010049 | Psp | Neg | Neg | Neg |     |     |     |     | Neg | Neg | Neg |
| KH010070 | Psp | Neg | Neg | Neg |     |     |     |     | Neg | Neg | Neg |
| KH021048 | Psp | Neg | Neg | Neg | Neg | Neg | Neg |     |     |     |     |
| KH010912 | Psp |     |     | Neg | Neg |     | Neg | Neg |     | Neg | Neg |
| KH020532 | Psp | Neg | Neg | Neg |     |     |     | Neg |     |     | Neg |
| KH010260 | Psp | Neg | Neg | Neg | Neg | Neg |     |     |     |     |     |
| KH010073 | Psp |     | Neg | Neg | Neg |     |     |     | Neg | Neg |     |
| KH010873 | Psp |     | Neg | Neg | Neg |     |     |     |     |     | Neg |
| KH010957 | Psp | Neg |     | Neg | Neg |     |     |     | Neg |     |     |
| KH020981 | Psp |     |     | Neg |     |     | Neg |     |     | Neg | Neg |
| KH021109 | Psp |     |     |     |     | Neg |     |     |     |     |     |
| KH021046 | Psp |     | Neg |     |     |     |     |     |     |     |     |
| KH020786 | Psp | Neg |     |     |     |     |     |     |     |     |     |
| KH021035 | Psp |     |     | Neg |     |     |     |     |     |     |     |
| KH021093 | Psp |     |     |     |     |     |     |     |     |     |     |
| KH010895 | Psp |     |     |     |     |     |     |     |     |     |     |
| KH010082 | Psp |     |     |     |     |     |     |     |     |     |     |
| KH010052 | Psp |     |     |     |     |     |     |     |     |     |     |

The top row indicates the survey time point (M0-M11) and subsequent rows indicate individual participants. The uPCR result in each survey is represented in columns 2-13 with the second column indicating the initial diagnosis of *Plasmodium* species (Psp). In follow up surveys participants can test negative (Neg), *P. falciparum* (PF) or *P. vivax* (PV). An empty cell indicates that no test was done.

**Additional file 1: Figure S2** The log parasite density of all 37 parasite carriers defined here as parasitaemic during 4 or more of the 12 monthly surveys (sorted by ID number). Each cell represents an individual participant. The three highlighted participants are also shown in Figure 5.

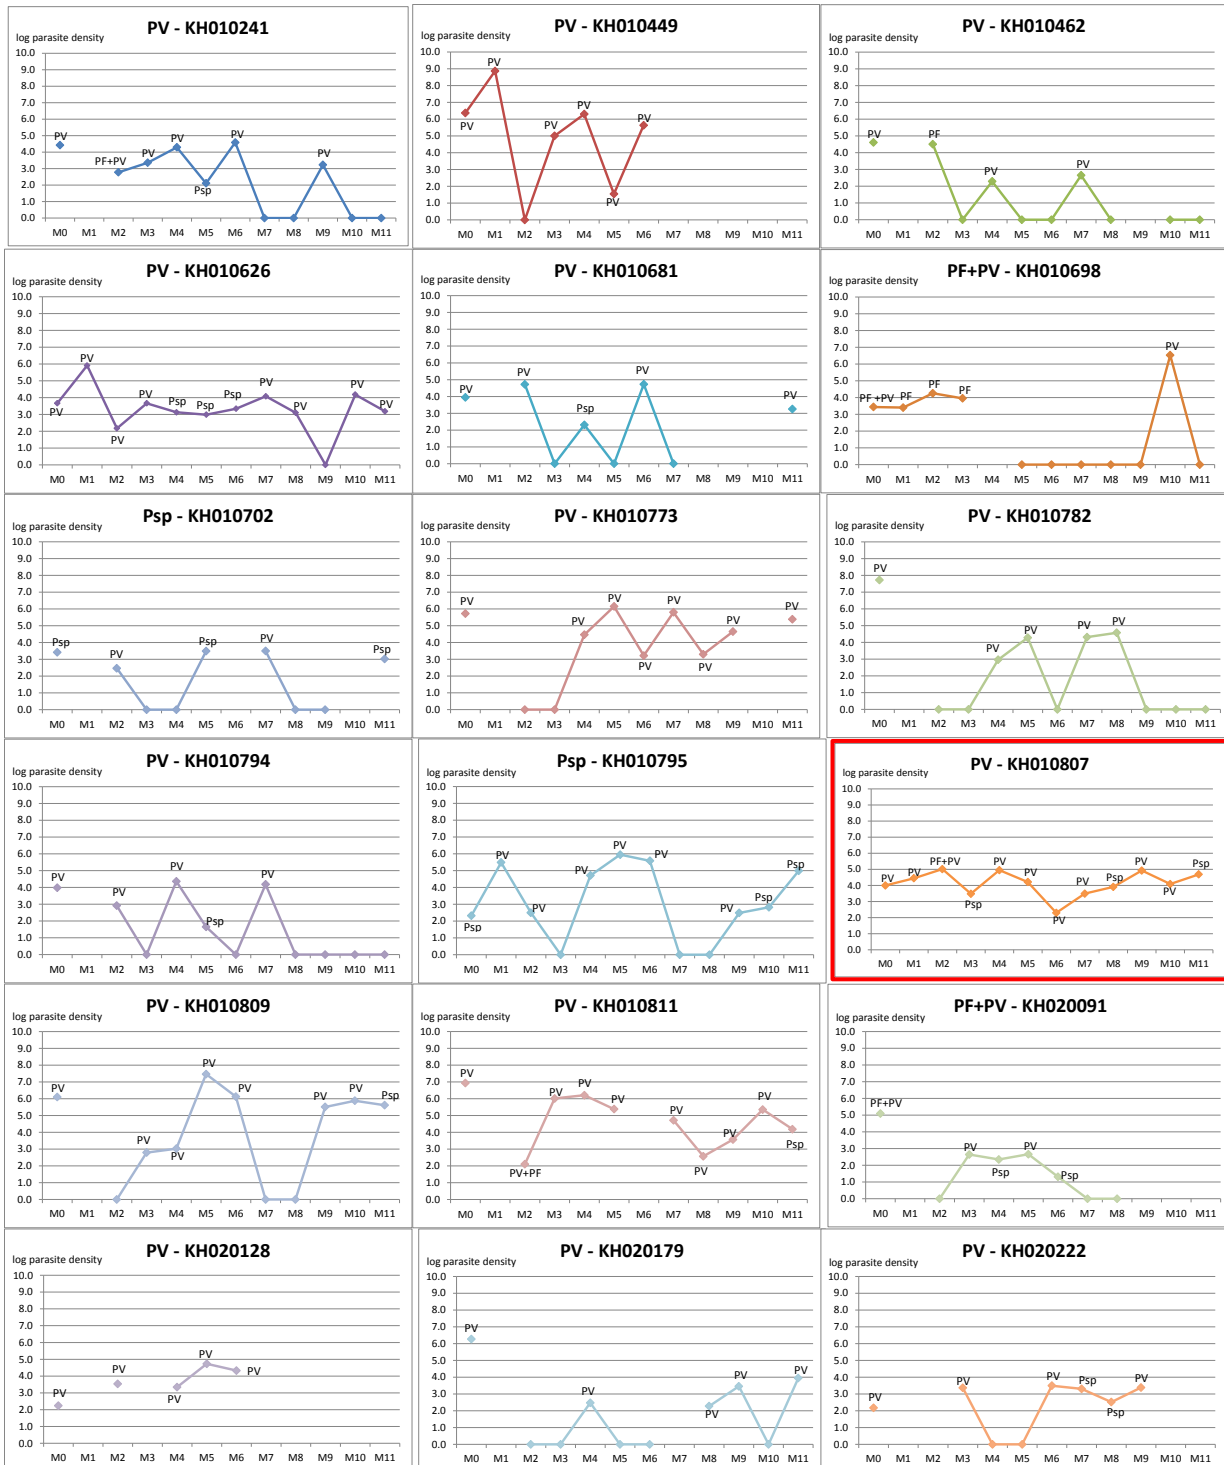

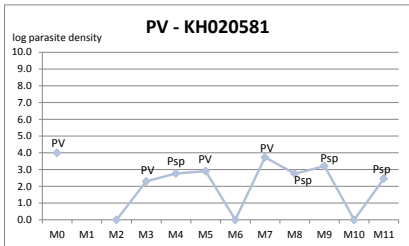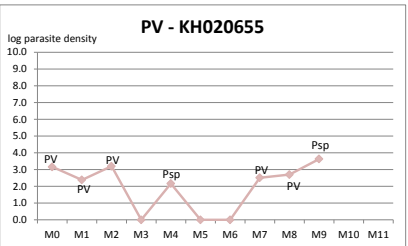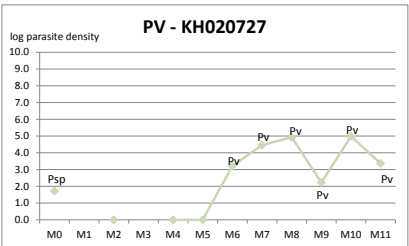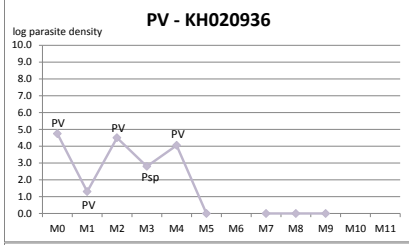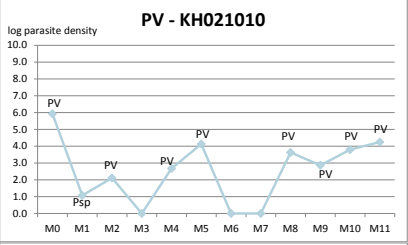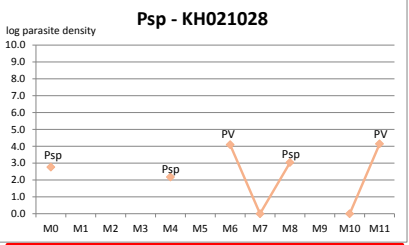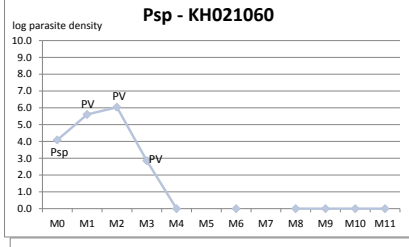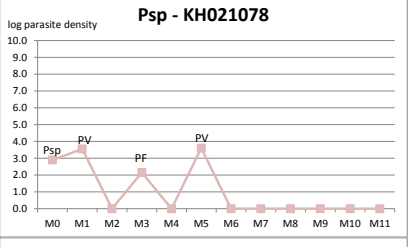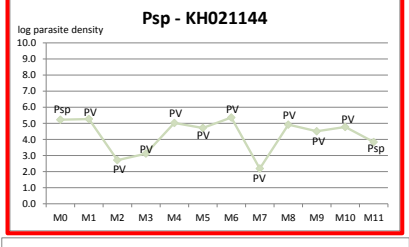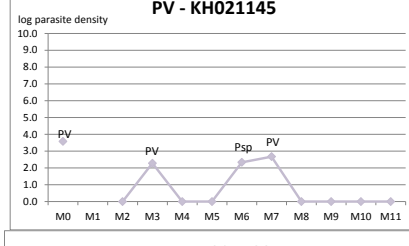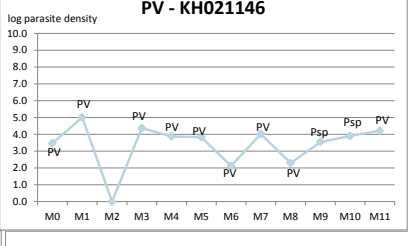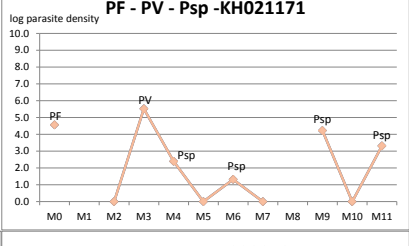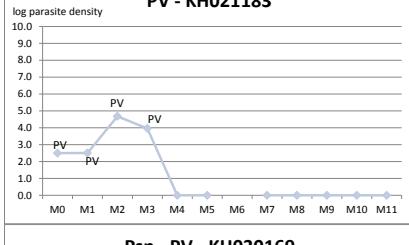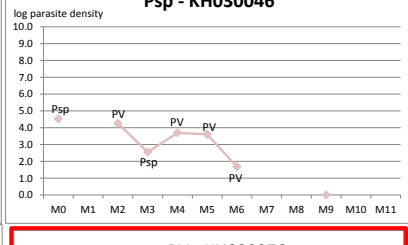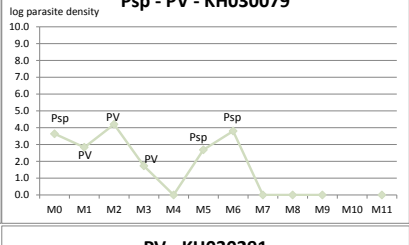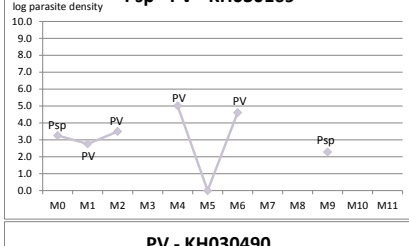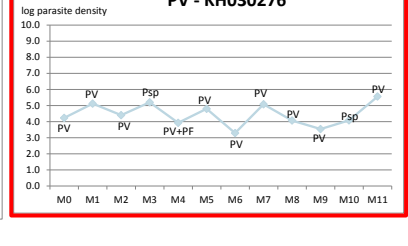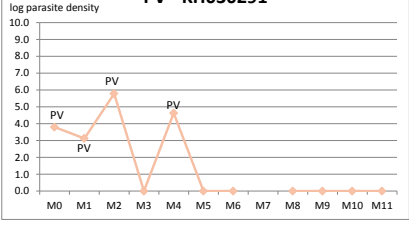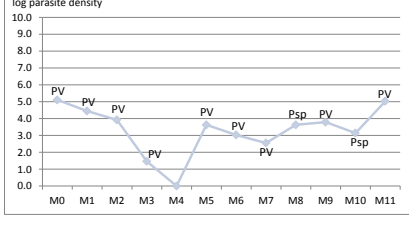

Supplement: MOESM1 [file 9762304]
